# Supplementary material for: Arsenic Induces M2 Macrophage Polarization and Shifts M1/M2 Cytokine Production via Mitophagy
Source: MDPI journal article supplement (doi:10.3390/ijms232213879), 2022-11-10
Supplement: s1 [file s1]

**Supplementary Table S1.** Mouse blood CD80/CD206 percentages after drinking 50 mg/L of arsenic-containing water for 24 weeks.

| Mouse Blood Cells (%) | Control   | Arsenic Treated |
|-----------------------|-----------|-----------------|
| CD80+                 | 2.3 ± 0.8 | 2.1 ± 0.7       |
| CD206+                | 4.0 ± 1.1 | * 9.6 ± 1.8     |

\*  $p < 0.05$ , arsenic treated vs un-treated by the Kruskal-Wallis test (N = 6)

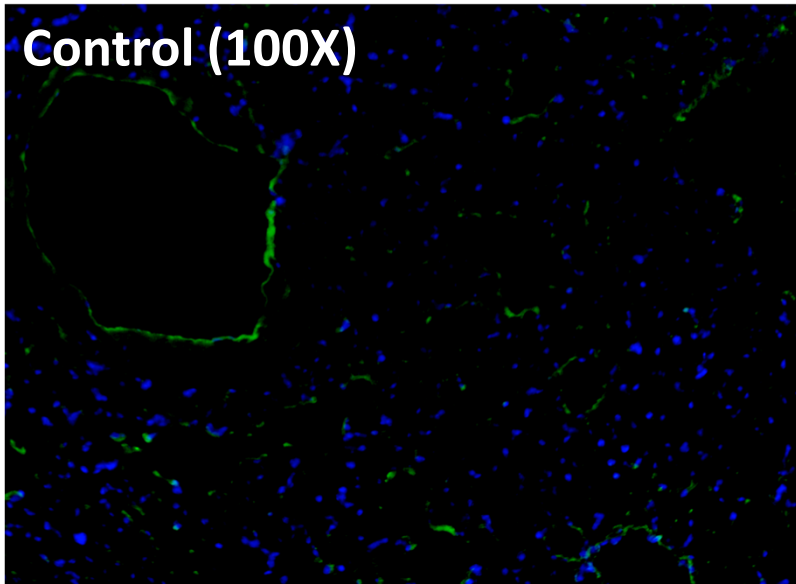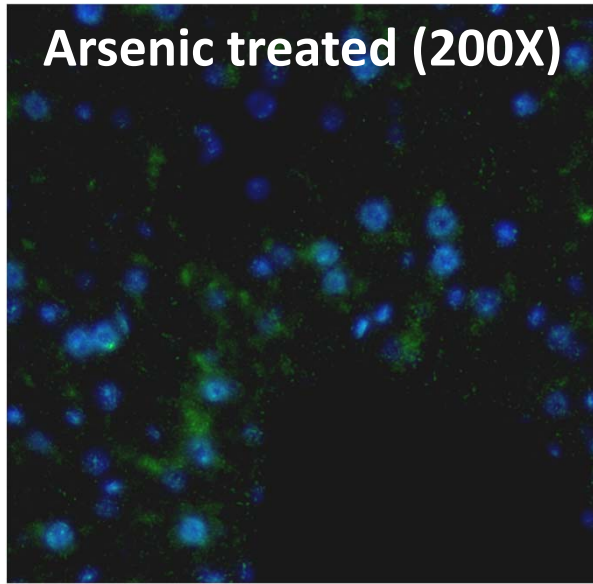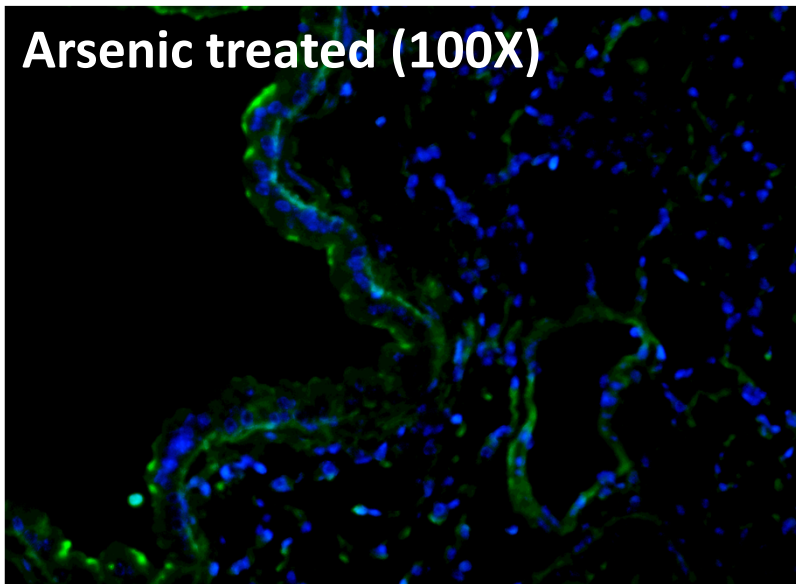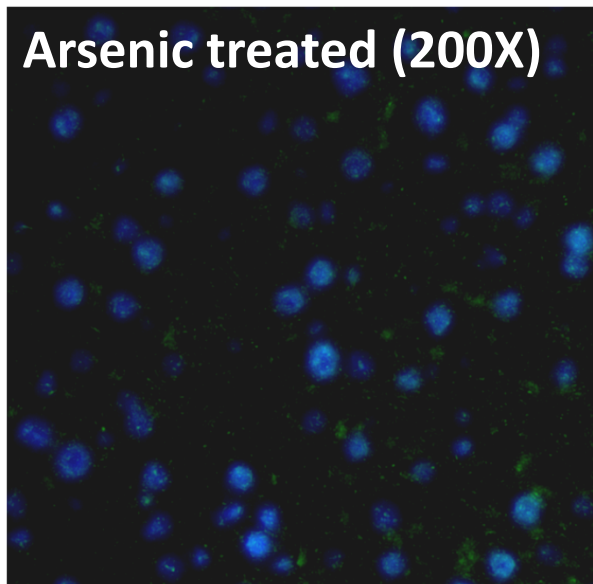

**Supplementary Figure S1.** Lung tissues from mouse (drinking 50 mg/L of arsenic-containing water for 24 weeks) were stained with CD206 (green) and DAPI. Left: air way view (100x); Right: infiltrated cell view (200x). N=6
